# Supplementary material for: Mast Cell Activation Triggered by Retrovirus Promotes Acute Viral Infection
Source: PubMed Central journal article supplement (PMC8859150; doi:10.3389/fmicb.2022.798660), 2022-02-07

## **Mast cell activation triggered by retrovirus promotes acute viral infection**

### **Supplementary Figure legends**

**Figure S1. Immune cells population.** C57BL/6 and Sash mice were infected i.p. with MuLV/Friend ( $1 \times 10^9$  copies) for indicated times, the frequencies of CD4<sup>+</sup> T, CD8<sup>+</sup> T and NK cells in spleen were quantified. One-way ANOVA was performed to analyze significance differences. Data are presented as mean  $\pm$  SD. \*  $p < 0.05$ , \*\*  $p < 0.01$  and \*\*\*  $p < 0.001$  are considered significant differences.

**Figure S2. BMMCs reconstruction.** BMMCs ( $5 \times 10^6$ ) were injected i.v. into Sash mice to reconstruct MCs. The splenic c-Kit<sup>+</sup> Fc $\epsilon$ RI<sup>+</sup> MCs were quantified. Data from one representative mouse are shown.

**Figure S3. MDSCs profile.** Mice of WT, Sash and Sash/BMBCs were infected i.p. with MuLV/Friend ( $1 \times 10^9$  copies) for 5 d, (A) the expressions of PD-L1 and CD39 in G-MDSCs were measured with flow cytometry. Data from one representative mouse are shown, (B) the frequency and phenotype of splenic M-MDSCs were profiled. One-way ANOVA was performed to analyze significance differences. Data are presented as mean  $\pm$  SD. \*  $p < 0.05$  and \*\*\*  $p < 0.001$  are considered significant differences.

**Figure S4. M-MDSCs in C48/80-treated infected mice.** C57BL/6 mice was administered with C48/80 (1 mg/kg) along with MuLV/Friend i.p. infection ( $1 \times 10^9$  copies). At 5dpi, the phenotypes of splenic M-MDSCs were profiled. One-way

ANOVA was performed to analyze significance differences. Data are presented as mean  $\pm$  SD. \*\*\*  $p < 0.001$  is considered significant differences.

**Figure S5. Phenotypes of M-MDSCs in histamine-treated infected mice. WT**

C57BL/6 mice were administrated with histamine (2.5 mg/kg) via i.p. during viral infection as above, at 5 dpi, the phenotypes of M-MDSCs in spleen were profiled.

**Figure S6. Phenotypes of M-MDSCs in Ebastine- or Loratadine-treated infected**

**mice.** C57BL/6 mice were infected i.p. with MuLV/Friend ( $1 \times 10^9$  copies), and Ebastine (5mg/kg) or Loratadine(10mg/kg) was administered 1 day before infection and continued daily throughout infection. At 5 dpi, the phenotypes of M-MDSCs in spleen were profiled. One-way ANOVA was performed to analyze significance differences. Data are presented as mean  $\pm$  SD. \*\*  $p < 0.01$  is considered significant differences.

# Figure S1

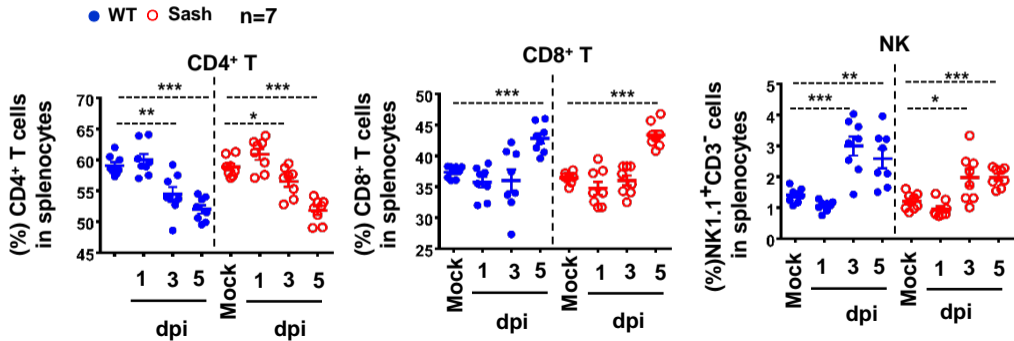

**Figure S2**

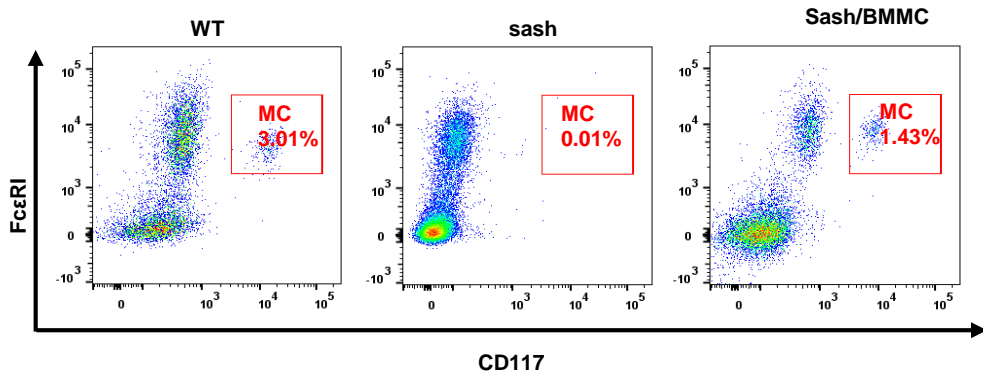

**Figure S3**

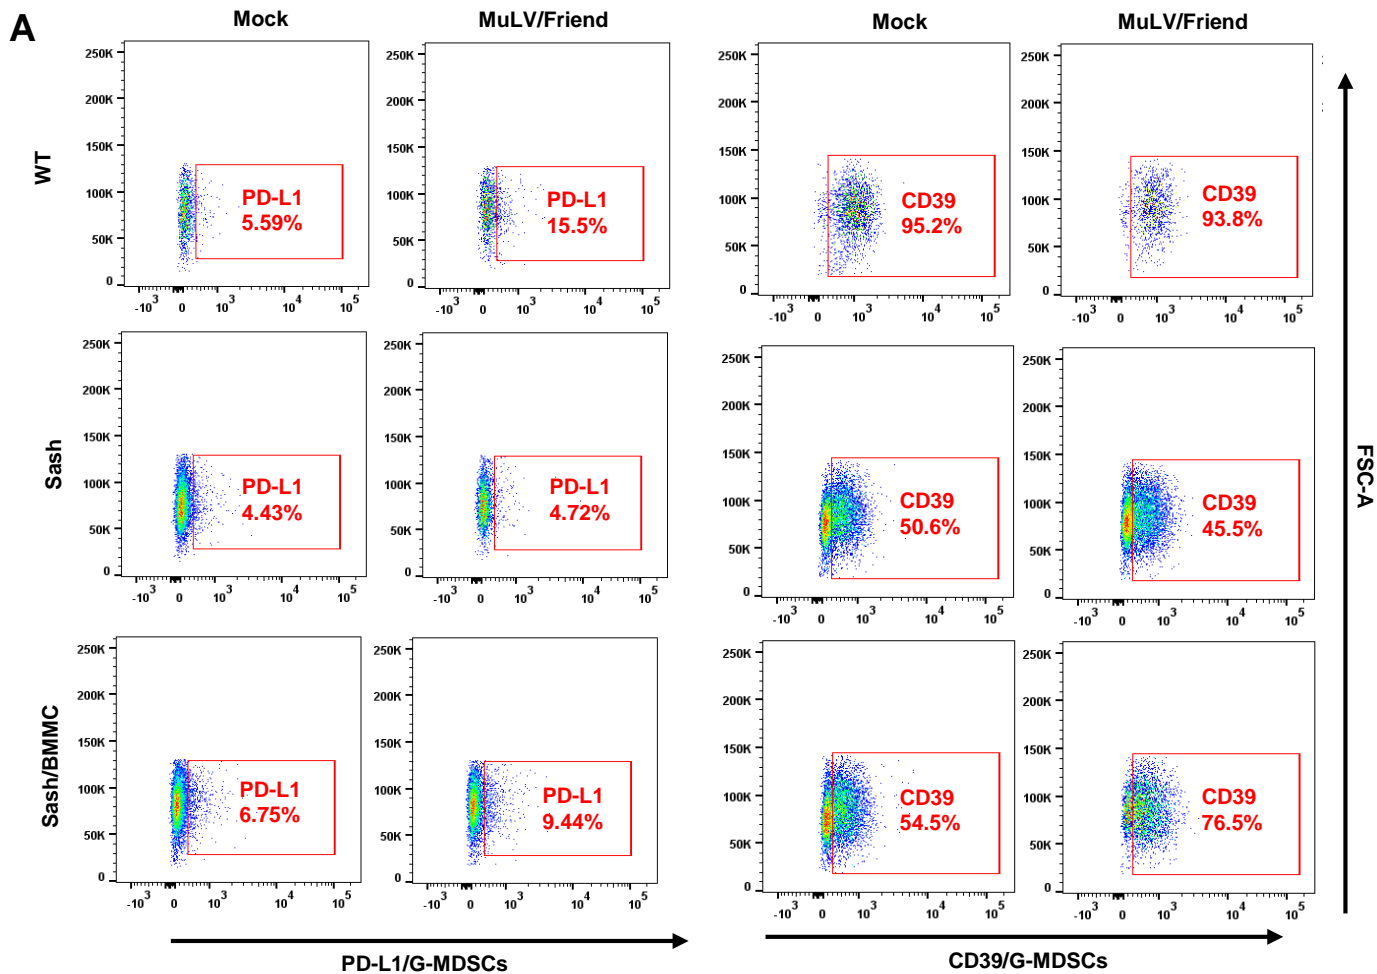

**B**

● WT ○ Sash ○ Sash/BMMC n=4

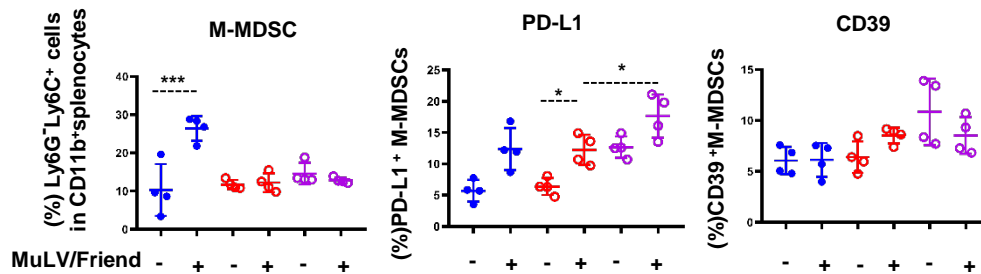

# Figure S4

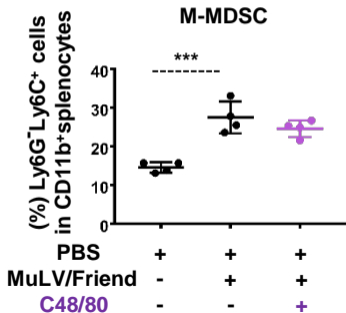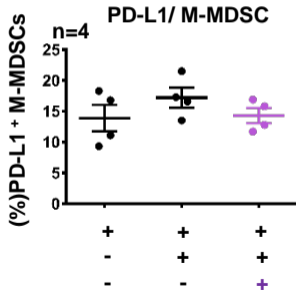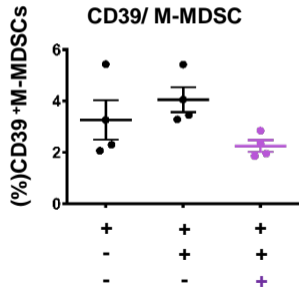

**Figure S5**

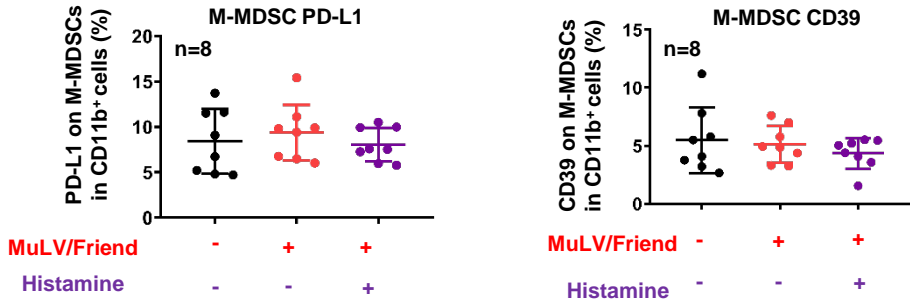

# Figure S6

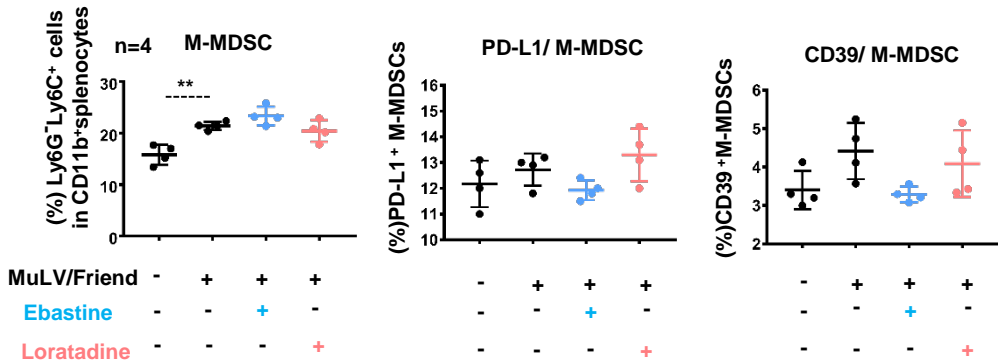

Supplement: Data_Sheet_1.pdf [file Data_Sheet_1.pdf]
